# Supplementary material for: Histone H3 and TORC1 prevent organelle dysfunction and cell death by promoting nuclear retention of HMGB proteins
Source: PubMed Central journal article supplement (PMC4989345; doi:10.1186/s13072-016-0083-3), 2016-08-17

Figure S1.

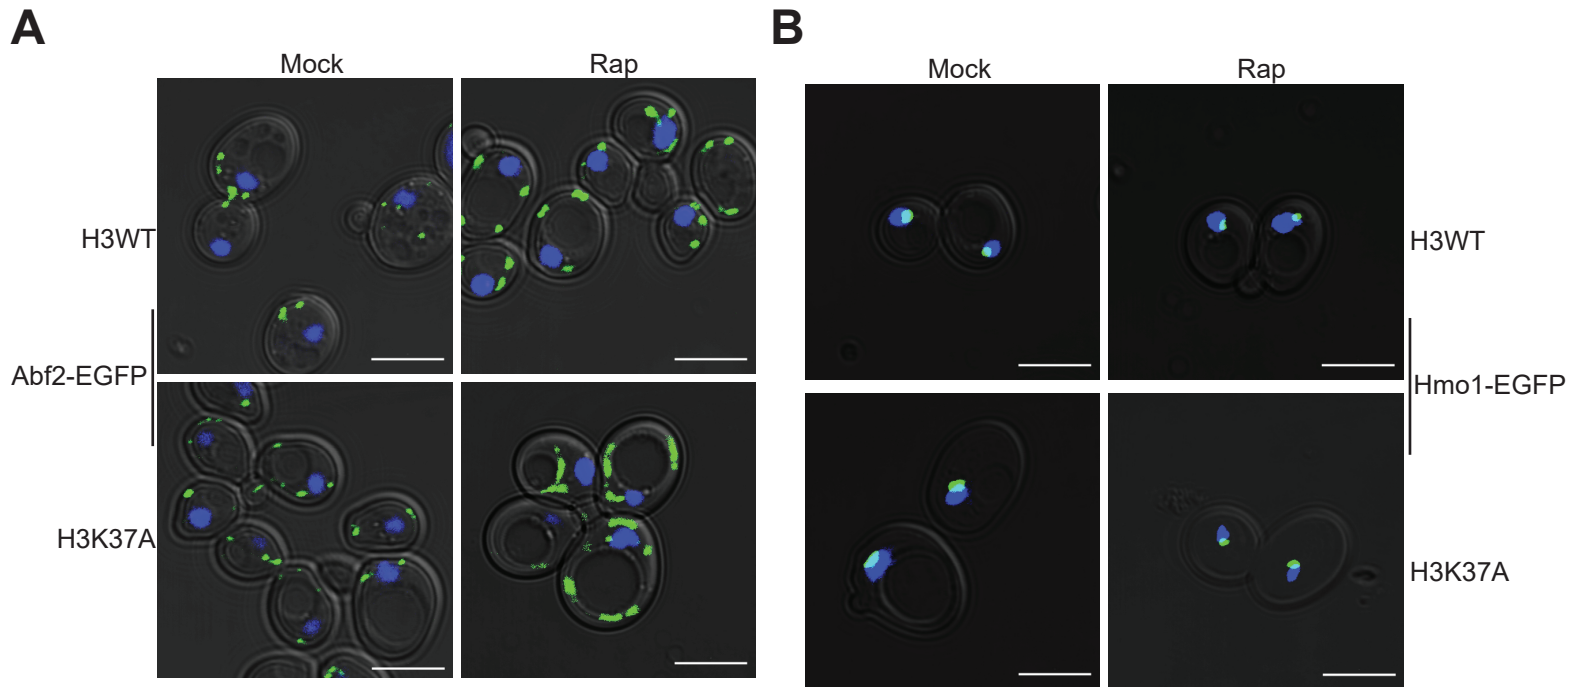

**Figure S2.**

**A**

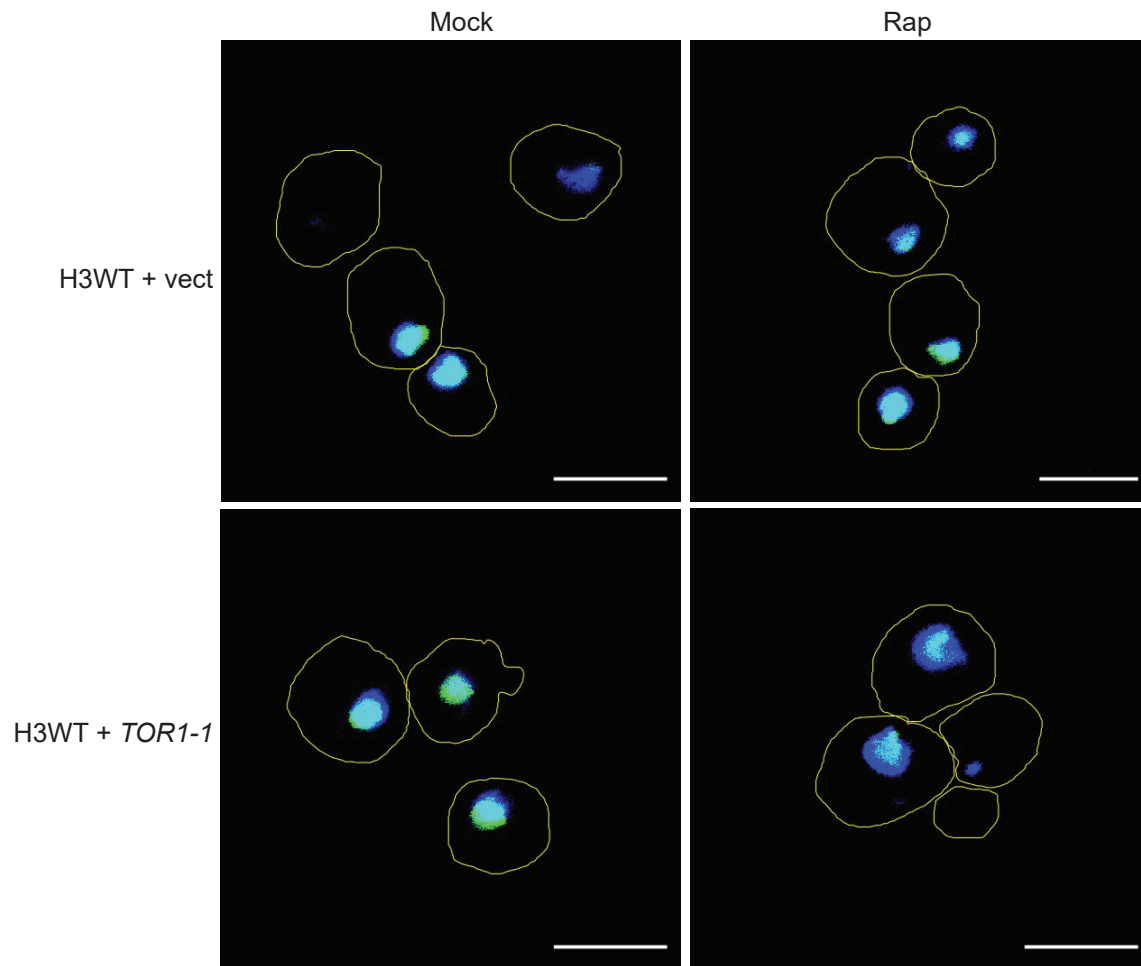

**B**

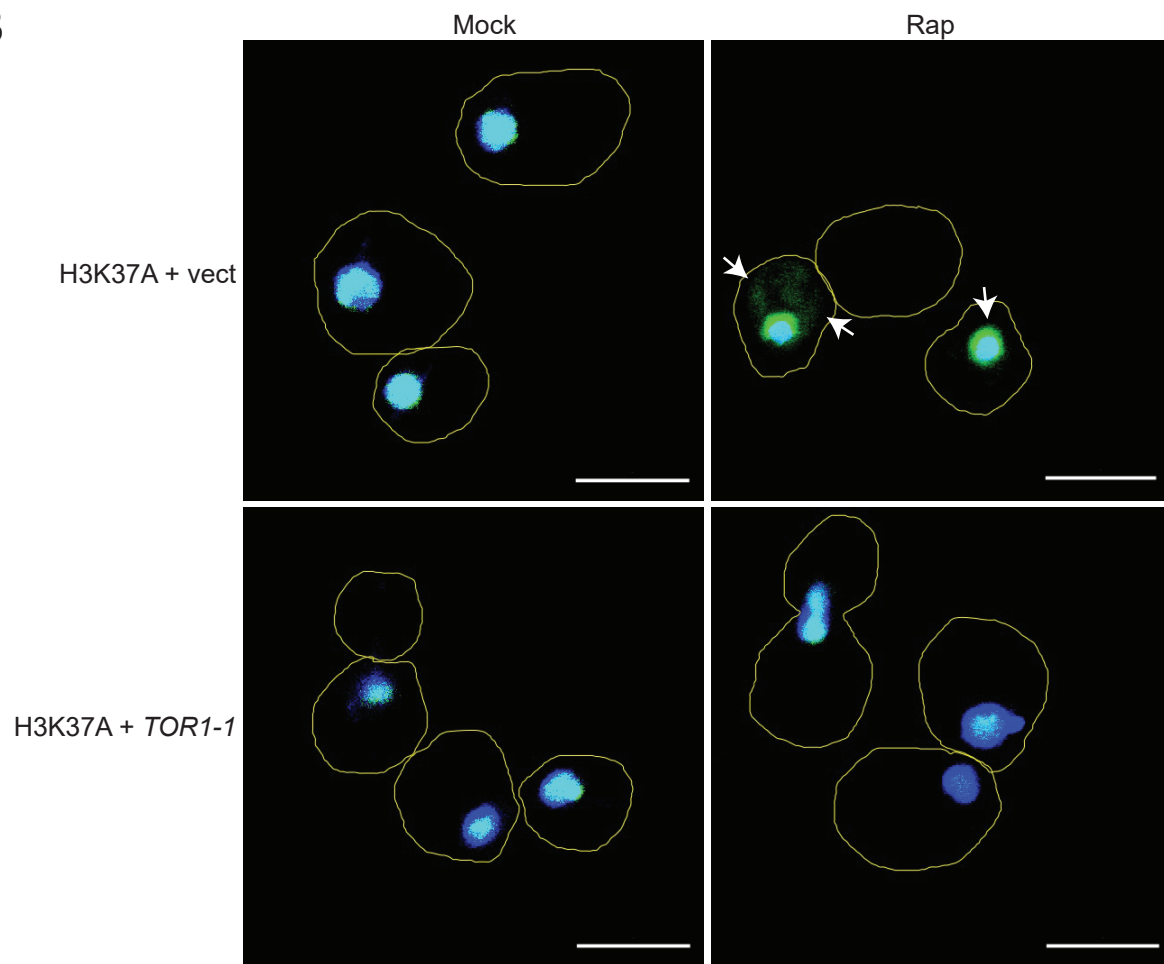

Figure S3.

**A**

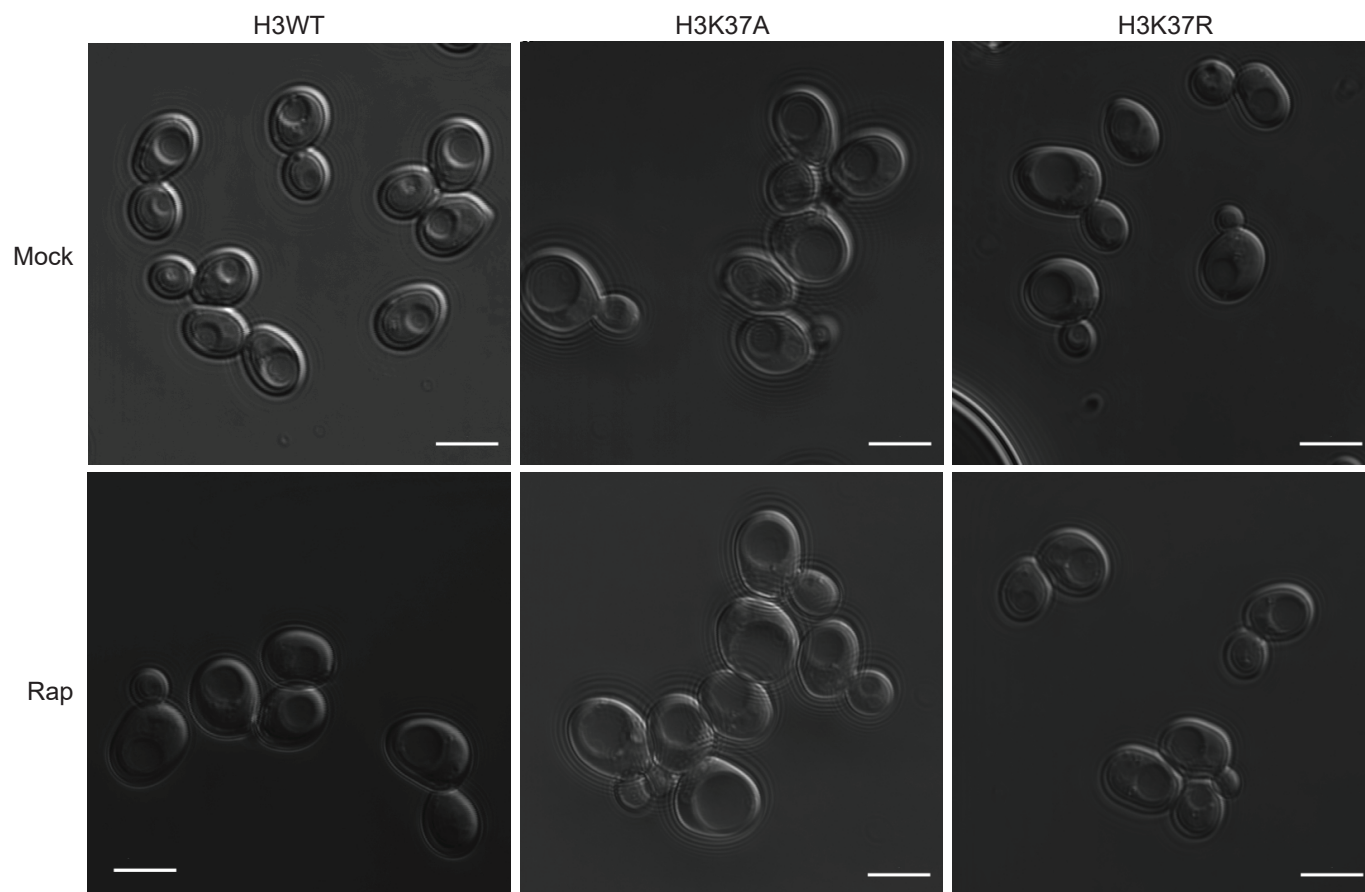

**B**

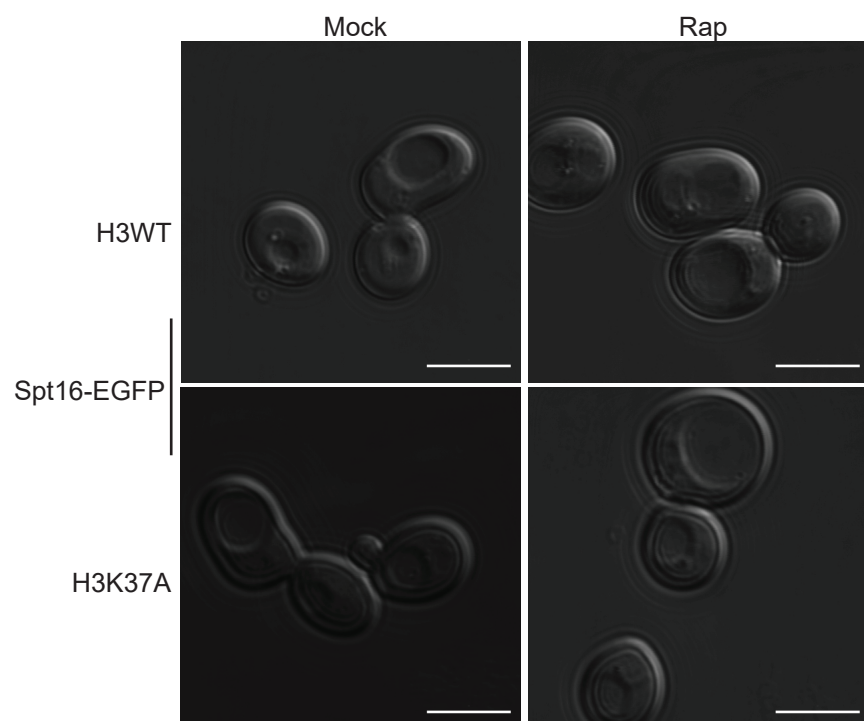

Supplement: 13072_2016_83_MOESM1_ESM.pdf [file 13072_2016_83_MOESM1_ESM.pdf]
